# Supplementary material for: Functionalized graphene oxide as a nanocatalyst in dephosphorylation reactions: pursuing artificial enzymes
Source: Royal Society of Chemistry journal article supplement (doi:10.1039/c4cc03262d), 2014-01-01
Supplement: c4cc03262d1.pdf [file c4cc03262d1.pdf]

# Functionalized graphene oxide as nanocatalyst in dephosphorylation reactions: pursuing artificial enzymes

*Elisa S. Orth* \*, *Jéssica E. S. Fonsaca*, *Thomas Golin Almeida*, *Sergio H. Domingues*,  
*José G. L. Fereira*, *Aldo J. G. Zarbin*\*

Department of Chemistry, Universidade Federal do Paraná (UFPR), CP 19081, CEP  
81531-990, Curitiba, PR, Brazil.

## SUPPLEMENTARY INFORMATION

|                                                                                                                                                                             |    |
|-----------------------------------------------------------------------------------------------------------------------------------------------------------------------------|----|
| <b>1. Experimental details</b>                                                                                                                                              | S2 |
| <b>2. Kinetics</b>                                                                                                                                                          | S2 |
| <b>2.1 Reaction of GOSH with DEDNPP at different pH values</b>                                                                                                              | S3 |
| <b>Figure S1.</b> Kinetic profile obtained at 400 nm for the reaction of GOSH with DEDNPP at pH 8. Solid line is the pseudo-first order fit.                                | S3 |
| <b>Figure S2.</b> Kinetic profile obtained at 400 nm for the reaction of GOSH with DEDNPP at pH 9. Solid line is the pseudo-first order fit.                                | S4 |
| <b>Figure S3.</b> Kinetic profile obtained at 400 nm for the reaction of GOSH with DEDNPP at pH 10. Solid line is the pseudo-first order fit.                               | S4 |
| <b>3. Potentiometric titration</b>                                                                                                                                          | S5 |
| <b>Figure S4.</b> Potentiometric titration curve for GOSH (1mg) using KOH 0.1008 M with $pK_a$ 's values determined. Solid line is the fit calculated by the program BEST7. | S5 |
| <b>4. Recycling of nanocatalyst: kinetic profiles</b>                                                                                                                       | S6 |
| <b>Figure S5.</b> Kinetic profile of the first reaction cycle obtained at 400 nm for the reaction of GOSH with DEDNPP at pH 8. Solid line is the pseudo-first order fit.    | S6 |

|                                                                                                                                                                           |     |
|---------------------------------------------------------------------------------------------------------------------------------------------------------------------------|-----|
| <b>Figure S6.</b> Kinetic profile of the second reaction cycle obtained at 400 nm for the reaction of GOSH with DEDNPP at pH 8. Solid line is the pseudo-first order fit. | S6  |
| <b>Figure S7.</b> Kinetic profile of the third reaction cycle obtained at 400 nm for the reaction of GOSH with DEDNPP at pH 8. Solid line is the pseudo-first order fit.  | S7  |
| <b>5. Thermogravimetric analyses</b>                                                                                                                                      | S7  |
| <b>Figure S8</b> – TGA analyses for all samples before and after reaction with DEDNPP.                                                                                    | S8  |
| <b>Table S1.</b> Most relevant information obtained from TGA and DTA analyses. <sup>1</sup>                                                                               | S8  |
| <b>6. Raman Spectroscopy</b>                                                                                                                                              | S9  |
| <b>Figure S9.</b> RAMAN spectra for the GOSH before and after the reaction with DEDNPP.                                                                                   | S9  |
| <b>Figure S10.</b> RAMAN spectra with typical deconvolution, using Lorentzian method, for GOSH before and after the reaction with DEDNPP.                                 | S10 |
| <b>REFERENCES</b>                                                                                                                                                         | S10 |

## 1. Experimental details

Graphene oxide (GO) was obtained by the modified Hummers method and functionalization with cysteamine was carried as previously described, leading to a solid catalyst: GOSH.<sup>1</sup> The nanocatalyst GOSH was not dispersible in any solvents tested: water, ethanol, methanol, benzene, toluene and acetonitrile. The phosphate ester DEDNPP was prepared by standard methods from POCl<sub>3</sub>, as described previously.<sup>2</sup> Inorganic salts were of analytical grade and used without further purification.

Infra-red spectra were recorded on a FTIR Bio-Rad spectrophotometer over the range of 4000-400 cm<sup>-1</sup>, using the KBr pellet method, and the graphs obtained are shown in the article. Further detailed band assignments were described previously.<sup>1</sup>

## 2. Kinetics

Reactions of DEDNPP were followed spectrophotometrically (UV-Vis Spectrophotometry UV-2450) by monitoring the appearance of 2,4-dinitrophenolate

(DNP) at 400 nm. Reactions were started by adding 10  $\mu\text{L}$  of 5 mM stock solutions of the substrate in acetonitrile to 3 mL of aqueous solutions to give a final concentration of the substrate of  $1.67 \times 10^{-5} \text{ mol L}^{-1}$ . Solid GOSH was added to 3 mL of a buffered solution ( $\text{KHCO}_3$ ,  $0.01 \text{ mol L}^{-1}$ ) at different pH values (pH 8-10) and kept under controlled temperature ( $20^\circ\text{C}$ ) and constant magnetic stirring. The temperatures of reaction solutions in quartz cuvettes were controlled at  $20^\circ\text{C}$ . Absorbance versus time data were stored directly on a microcomputer, and observed first-order rate constants,  $k_{\text{obs}}$ , were calculated, using an iterative least-squares program; correlation coefficients were  $> 0.999$  for all kinetic runs. The pH was maintained with 0.01 M buffers of  $\text{KHCO}_3$  (pH 8-10). The rate constants for the spontaneous reaction of DEDNPP ( $k_{\text{H}_2\text{O}}$ ) was obtained from a previous report (at  $25^\circ\text{C}$ )<sup>2</sup> and extrapolated to  $20^\circ\text{C}$  by using the commonly known Arrhenius equation. Thus, at pH 8, 9 and 10, the corresponding  $k_{\text{H}_2\text{O}}$  values are  $5.93 \times 10^{-8}$ ,  $1.02 \times 10^{-7}$  and  $3.60 \times 10^{-7} \text{ M}^{-1}\text{s}^{-1}$ , respectively.

## 2.1 Reaction of GOSH with DEDNPP at different pH values

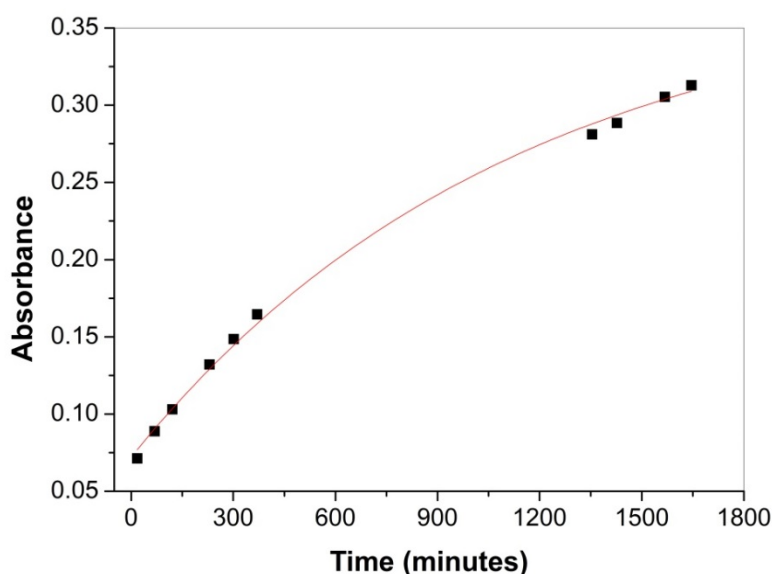

**Figure S1.** Kinetic profile obtained at 400 nm for the reaction of GOSH with DEDNPP at pH 8. Solid line is the pseudo-first order fit.

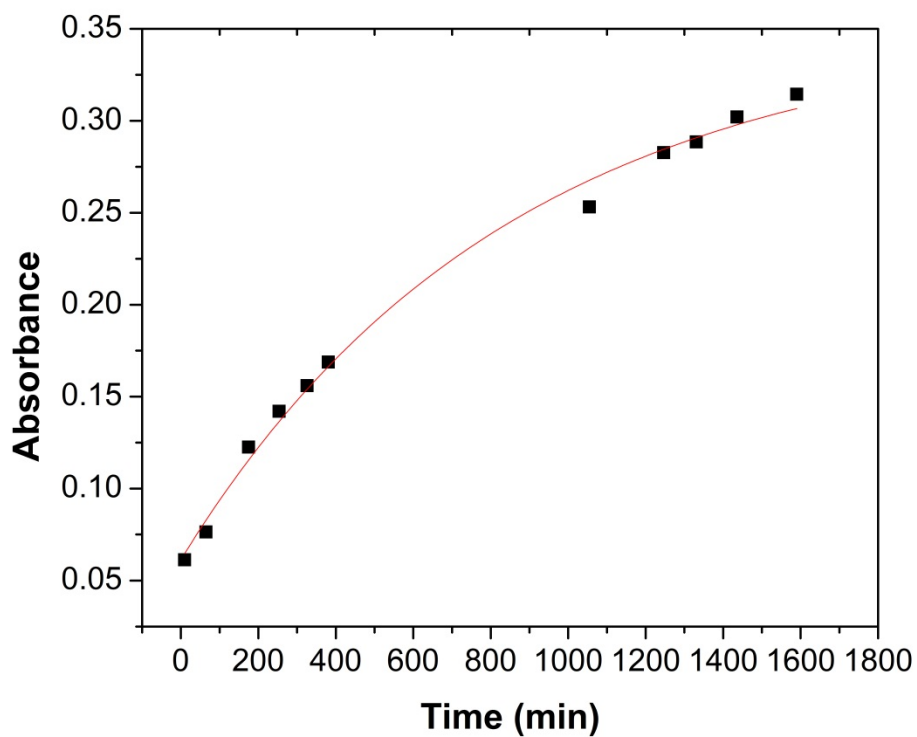

**Figure S2.** Kinetic profile obtained at 400 nm for the reaction of GOSH with DEDNPP at pH 9. Solid line is the pseudo-first order fit.

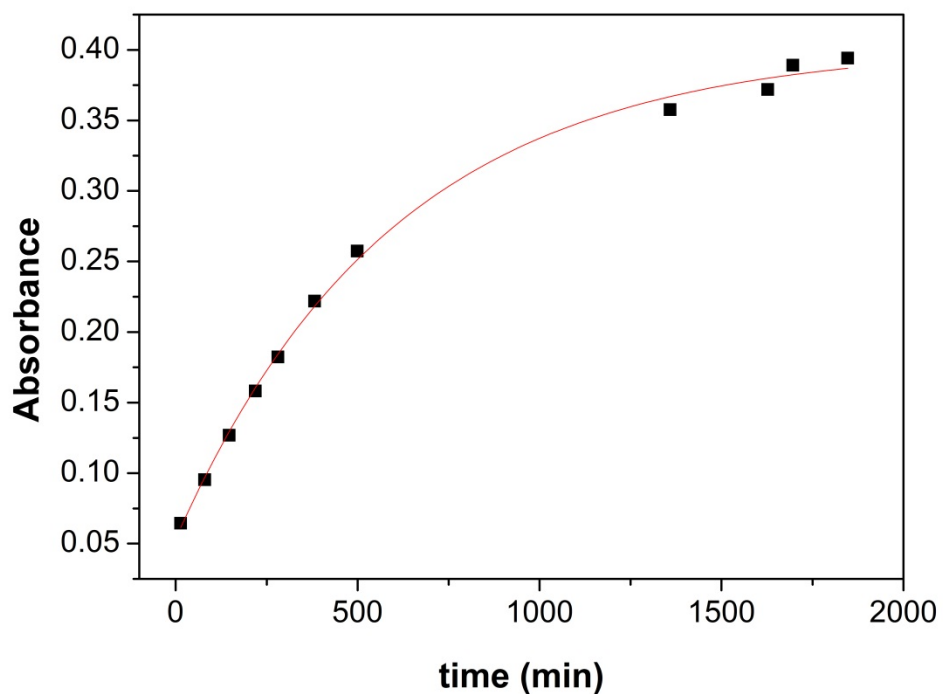

**Figure S3.** Kinetic profile obtained at 400 nm for the reaction of GOSH with DEDNPP at pH 10. Solid line is the pseudo-first order fit.

### 3. Potentiometric titration

The  $pK_a$  values for GOSH were determined using a digital pH meter and a combined glass electrode. Titrations were performed in a 150 mL thermostatted cell, at 25.0 °C. The solution was titrated with small increments of  $5 \times 10^{-3}$  M  $\text{CO}_2$ -free KOH. All precautions were taken to eliminate carbonate and  $\text{CO}_2$  during the titration. The program BEST7 was used to calculate the dissociation constants, using the value -13.78 for  $pK_w$ .<sup>3</sup> Three  $pK_a$ 's values were determined for GOSH, which refer to (i) carboxylic acid ( $\sim 4.5$ ); (ii) thiol group ( $\sim 6.5$ ) and (iii) alcohol groups ( $\sim 9.0$ ). These  $pK_a$ 's are expected, since the values for carboxylic acid and alcohol moieties have been reported for GO samples.<sup>4</sup> Values for thiol groups are low, but also expected for complex samples where neighboring groups can lead to more acidic thiol groups, such as in proteins (cysteine residues).<sup>5</sup> This approach has been successfully used by other authors in complex systems<sup>6,7</sup> such as the presented here, thus validating the present considerations.

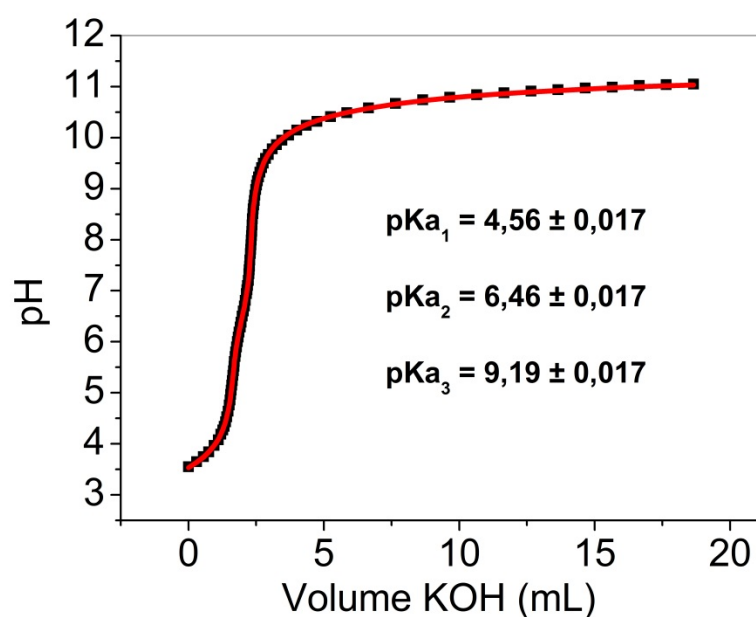

**Figure S4.** Potentiometric titration curve for GOSH (1mg) using KOH 0.1008 M with  $pK_a$ 's values determined. Solid line is the fit calculated by the program BEST7.

#### 4. Recycling of nanocatalyst

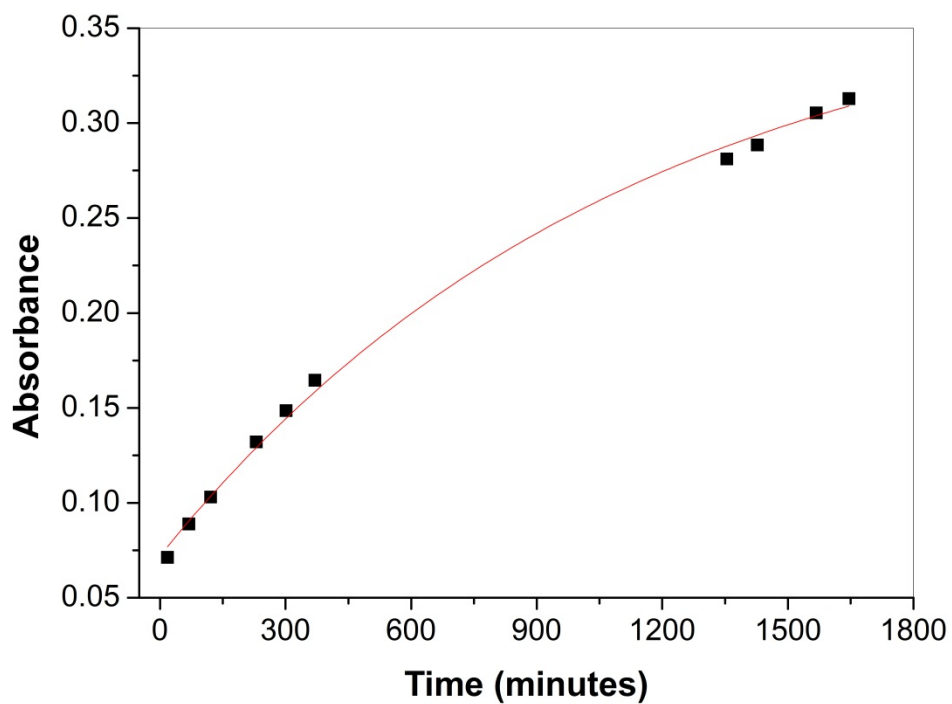

**Figure S5.** Kinetic profile of the first reaction cycle obtained at 400 nm for the reaction of GOSH with DEDNPP at pH 8. Solid line is the pseudo-first order fit.

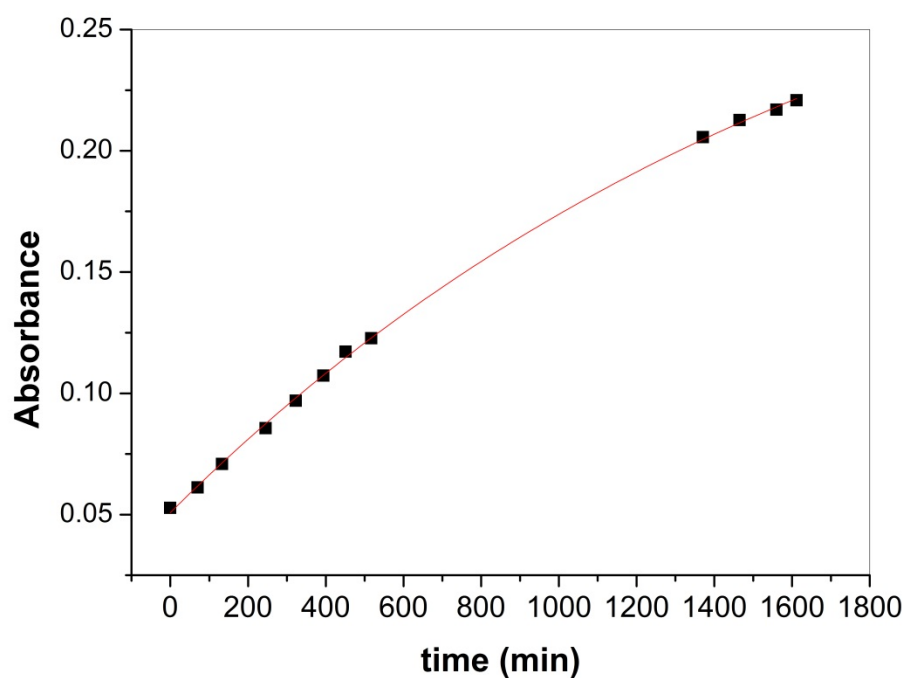

**Figure S6.** Kinetic profile of the second reaction cycle obtained at 400 nm for the reaction of GOSH with DEDNPP at pH 8. Solid line is the pseudo-first order fit.

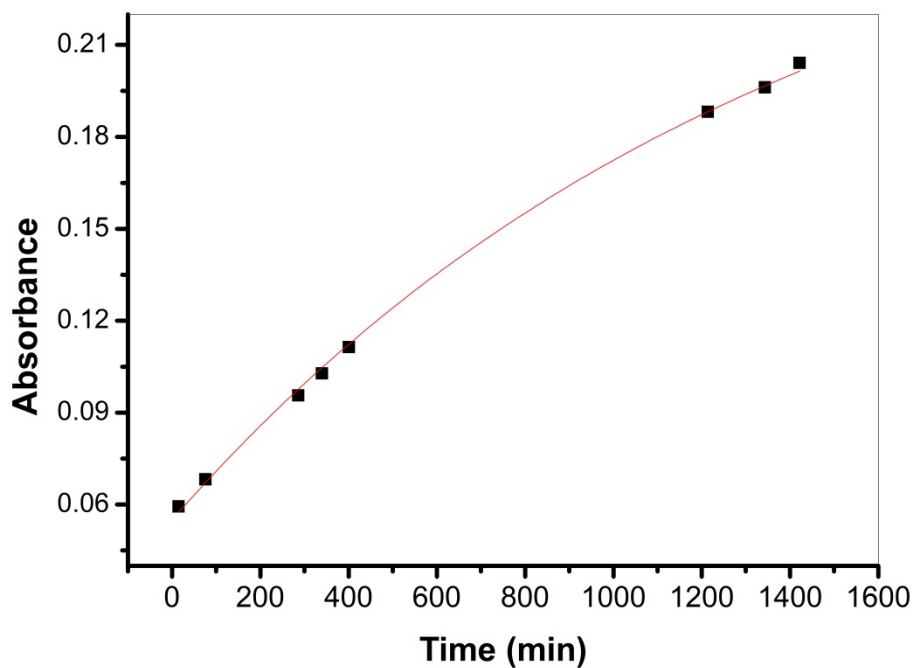

**Figure S7.** Kinetic profile of the third reaction cycle obtained at 400 nm for the reaction of GOSH with DEDNPP at pH 8. Solid line is the pseudo-first order fit.

### 5. Thermogravimetric analyses

Simultaneous thermogravimetric analyses (TGA/DSC) were carried out in SDT Q600 equipment (TA Instruments) from TA Instruments under 100 mL min<sup>-1</sup> Ar at a heating rate of 5 °C min<sup>-1</sup>. The software OriginPro 8.0 was used to analyze all experimental data and graphs.

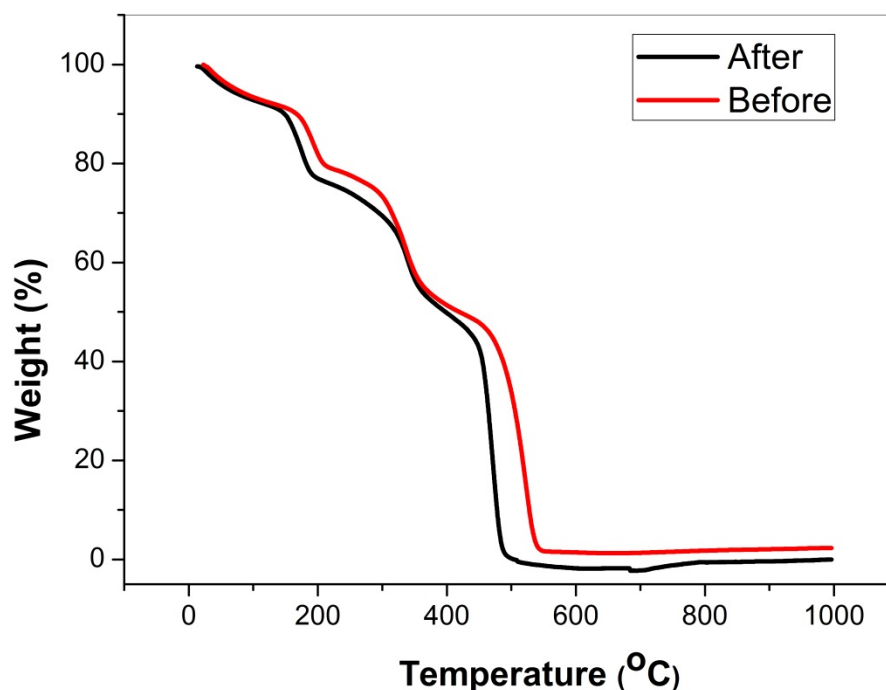

**Figure S8** – TGA analyses for all samples before and after reaction with DEDNPP.

**Table S1.** Most relevant information obtained from TGA and DTA analyses.<sup>1</sup>

|                                    | Group assigned to weight loss | GOSH before reaction | GOSH after recycling |
|------------------------------------|-------------------------------|----------------------|----------------------|
| <b>T (°C)/<br/>Weight loss (%)</b> | Oxygenated                    | 140-220 / 12.2       | 110-230 / 17.0       |
|                                    | Thiol                         | 255-383 / 22.8       | 240-400/ 28.4        |
|                                    | Carbon backbone               | 440-550 / 46.0       | 420-525 / 54.0       |
| <b>% residual</b>                  |                               | 1.5                  | 0                    |

The local concentration of reactive thiol groups on the GO surface was calculated considering the second major weight loss, which is due to the thiol moieties.<sup>1</sup> Therefore, considering molar mass of thiol functionality 104 g/mol, gives a concentration of thiol groups of  $8.42 \times 10^{-4}$  mol L<sup>-1</sup>/mg of solid GOSH

## 6. Raman Spectroscopy

The Raman spectra were done by a Renishaw Raman image spectrophotometer using a long range 50 objective lens (Olympus). The wavelength of the excitation laser was 514.5 nm (He-Ne laser) with the laser power fixed under 1.0mW. Raman spectra for GO and GOSH (before and after reaction) are given in Figure S9. The band at  $\sim 2930\text{ cm}^{-1}$  is related to the  $\text{CH}_2$  asymmetric stretch of cysteamine<sup>1</sup> anchored on the GOSH (marked with an arrow in Figure S9). Depiction of the peaks and intensity ratios were obtained by deconvolution using Lorentzian method (Figure S10). The  $I_D/I_G$  ratios were calculated by taking the average of at least 7 spectra from each sample.  $I_D/I_G$  ratio found for GO is 0.99.<sup>1</sup>

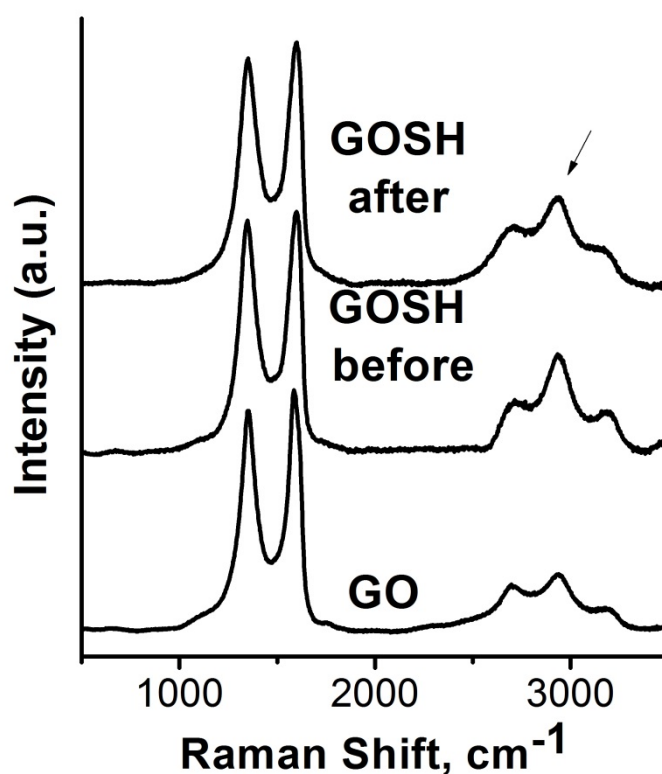

**Figure S9.** RAMAN spectra for GO and GOSH before and after the reaction with DEDNPP.

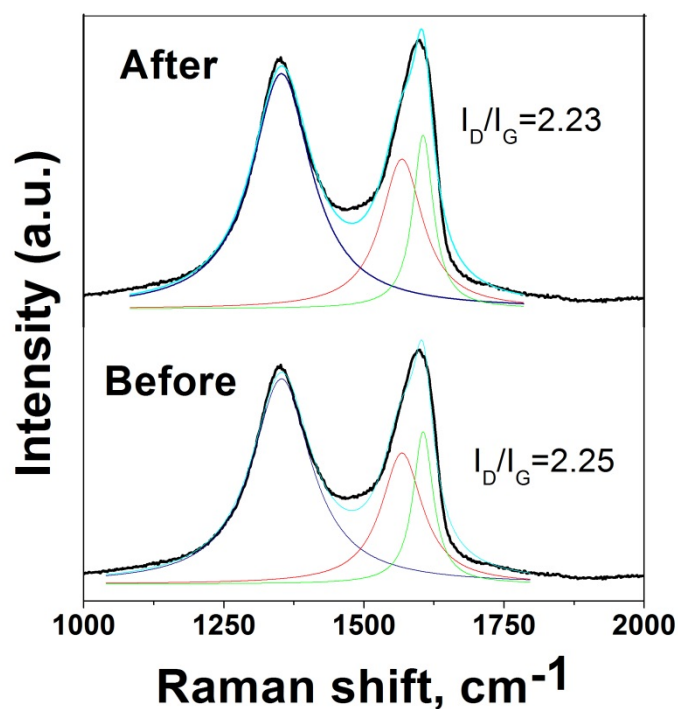

**Figure S10.** RAMAN spectra with typical deconvolution, using Lorentzian method, for GOSH before and after the reaction with DEDNPP.

## REFERENCES

- (1) Orth, E. S.; Fonsaca, J. E. S.; Domingues, S. H.; Mehl, H.; Oliveira, M. M.; Zarbin, A. J. G. *Carbon* **2013**, *61*, 543.
- (2) Orth, E. S.; Wanderlind, E. H.; Medeiros, M.; Oliveira, P. S. M.; Vaz, B. G.; Eberlin, M. N.; Kirby, A. J.; Nome, F. *J Org Chem* **2011**, *76*, 8003.
- (3) MARTELL, A. E.; HANCOCK, R. D. *Metal Complexes in Aqueous Solutions*; Plenum Press: New York, 1996.
- (4) Konkena, B.; Vasudevan, S. *J Phys Chem Lett* **2012**, *3*, 867.
- (5) Vohnik, S.; Hanson, C.; Tuma, R.; Fuchs, J. A.; Woodward, C.; Thomas, G. J. *Protein Sci* **1998**, *7*, 193.
- (6) Fernandes, A. N.; Giacomelli, C.; Giovanela, M.; Vaz, D. O.; Szpoganicz, B.; Sierra, M. M. D. *J Brazil Chem Soc* **2009**, *20*, 1715.
- (7) Sierra, M. M. D.; Arend, K.; Fernandes, A. N.; Giovanela, M.; Szpoganicz, B. *Anal Chim Acta* **2001**, *445*, 89.
